# Supplementary material for: Unfolded Protein Response Suppression in Yeast by Loss of tRNA Modifications
Source: Genes (Basel). 2018 Oct 23;9(11):516. doi: 10.3390/genes9110516 (PMC6275073; doi:10.3390/genes9110516)
Supplement: Supplementary file 1 [file genes-09-00516-s001.xlsx]

## Sheet: term finder results_compartment
GOID	GO_term	Cluster frequency	Background frequency	P-value	FDR	Expected FP	Gene(s) annotated to the term
44445	cytosolic part	105 out of 610 genes, 17.2%	243 out of 7165 background genes, 3.4%	7.39e-48	0.00	0.00	FUN12/YAL035W:RPL19B/YBL027W:RPS8A/YBL072C:RPL23A/YBL087C:RPL32/YBL092W:RPS11B/YBR048W:RPL19A/YBR084C-A:RPS6B/YBR181C:RPS9B/YBR189W:RPL21A/YBR191W:NAT1/YDL040C:RPL31A/YDL075W:RPS16B/YDL083C:RPL35B/YDL136W:CCT4/YDL143W:RPN5/YDL147W:RPL35A/YDL191W:RPS11A/YDR025W:RPS13/YDR064W:RLI1/YDR091C:CCT6/YDR188W:RPN9/YDR427W:RPS17B/YDR447C:RPS18A/YDR450W:PRE1/YER012W:RNR1/YER070W:RPS24A/YER074W:PUP3/YER094C:R…
32991	macromolecular complex	353 out of 610 genes, 57.9%	2194 out of 7165 background genes, 30.6%	9.33e-46	0.00	0.00	VPS8/YAL002W:CCR4/YAL021C:MAK16/YAL025C:MYO4/YAL029C:FUN12/YAL035W:RBG1/YAL036C:UTP20/YBL004W:FUS3/YBL016W:RPL19B/YBL027W:APL3/YBL037W:RPS8A/YBL072C:RPL23A/YBL087C:RPL32/YBL092W:SEA4/YBL104C:RPS11B/YBR048W:RPL19A/YBR084C-A:RFC5/YBR087W:EXO84/YBR102C:TPS1/YBR126C:SUP45/YBR143C:CDC28/YBR160W:RPS6B/YBR181C:RPS9B/YBR189W:RPL21A/YBR191W:APM3/YBR288C:TAF2/YCR042C:PWP2/YCR057C:MSH3/YCR092C:CDC39/YCR093W…
22626	cytosolic ribosome	78 out of 610 genes, 12.8%	180 out of 7165 background genes, 2.5%	7.82e-35	0.00	0.00	FUN12/YAL035W:RPL19B/YBL027W:RPS8A/YBL072C:RPL23A/YBL087C:RPL32/YBL092W:RPS11B/YBR048W:RPL19A/YBR084C-A:RPS6B/YBR181C:RPS9B/YBR189W:RPL21A/YBR191W:NAT1/YDL040C:RPL31A/YDL075W:RPS16B/YDL083C:RPL35B/YDL136W:RPL35A/YDL191W:RPS11A/YDR025W:RPS13/YDR064W:RLI1/YDR091C:RPS17B/YDR447C:RPS18A/YDR450W:RPS24A/YER074W:RPS8B/YER102W:RPL23B/YER117W:RPS26B/YER131W:GCN20/YFR009W:RPL24A/YGL031C:RPL28/YGL103W:RPS2/…
5622	intracellular	581 out of 610 genes, 95.2%	5535 out of 7165 background genes, 77.3%	1.47e-34	0.00	0.00	VPS8/YAL002W:CYS3/YAL012W:FUN30/YAL019W:CCR4/YAL021C:MAK16/YAL025C:MYO4/YAL029C:FUN12/YAL035W:RBG1/YAL036C:CDC19/YAL038W:GDH3/YAL062W:SWH1/YAR042W:UTP20/YBL004W:SLA1/YBL007C:FUS3/YBL016W:RPL19B/YBL027W:APL3/YBL037W:URA7/YBL039C:SKT5/YBL061C:RPS8A/YBL072C:ILS1/YBL076C:RPL23A/YBL087C:TEL1/YBL088C:RPL32/YBL092W:SEA4/YBL104C:PKC1/YBL105C:NTH2/YBR001C:IPP1/YBR011C:OLA1/YBR025C:YPK3/YBR028C:ZTA1/YBR046…
44424	intracellular part	579 out of 610 genes, 94.9%	5522 out of 7165 background genes, 77.1%	1.71e-33	0.00	0.00	VPS8/YAL002W:CYS3/YAL012W:FUN30/YAL019W:CCR4/YAL021C:MAK16/YAL025C:MYO4/YAL029C:FUN12/YAL035W:RBG1/YAL036C:CDC19/YAL038W:GDH3/YAL062W:SWH1/YAR042W:UTP20/YBL004W:SLA1/YBL007C:FUS3/YBL016W:RPL19B/YBL027W:APL3/YBL037W:URA7/YBL039C:SKT5/YBL061C:RPS8A/YBL072C:ILS1/YBL076C:RPL23A/YBL087C:TEL1/YBL088C:RPL32/YBL092W:SEA4/YBL104C:PKC1/YBL105C:NTH2/YBR001C:IPP1/YBR011C:OLA1/YBR025C:YPK3/YBR028C:ZTA1/YBR046…
44464	cell part	587 out of 610 genes, 96.2%	5708 out of 7165 background genes, 79.7%	1.54e-32	0.00	0.00	VPS8/YAL002W:CYS3/YAL012W:FUN30/YAL019W:CCR4/YAL021C:LTE1/YAL024C:MAK16/YAL025C:MYO4/YAL029C:FUN12/YAL035W:RBG1/YAL036C:CDC19/YAL038W:GDH3/YAL062W:SWH1/YAR042W:UTP20/YBL004W:SLA1/YBL007C:FUS3/YBL016W:RPL19B/YBL027W:APL3/YBL037W:URA7/YBL039C:SKT5/YBL061C:RPS8A/YBL072C:ILS1/YBL076C:RPL23A/YBL087C:TEL1/YBL088C:RPL32/YBL092W:SEA4/YBL104C:PKC1/YBL105C:NTH2/YBR001C:IPP1/YBR011C:OLA1/YBR025C:YPK3/YBR028…
5623	cell	587 out of 610 genes, 96.2%	5708 out of 7165 background genes, 79.7%	1.54e-32	0.00	0.00	VPS8/YAL002W:CYS3/YAL012W:FUN30/YAL019W:CCR4/YAL021C:LTE1/YAL024C:MAK16/YAL025C:MYO4/YAL029C:FUN12/YAL035W:RBG1/YAL036C:CDC19/YAL038W:GDH3/YAL062W:SWH1/YAR042W:UTP20/YBL004W:SLA1/YBL007C:FUS3/YBL016W:RPL19B/YBL027W:APL3/YBL037W:URA7/YBL039C:SKT5/YBL061C:RPS8A/YBL072C:ILS1/YBL076C:RPL23A/YBL087C:TEL1/YBL088C:RPL32/YBL092W:SEA4/YBL104C:PKC1/YBL105C:NTH2/YBR001C:IPP1/YBR011C:OLA1/YBR025C:YPK3/YBR028…
43228	non-membrane-bounded organelle	236 out of 610 genes, 38.7%	1361 out of 7165 background genes, 19.0%	2.74e-30	0.00	0.00	FUN30/YAL019W:CCR4/YAL021C:MAK16/YAL025C:MYO4/YAL029C:FUN12/YAL035W:RBG1/YAL036C:UTP20/YBL004W:SLA1/YBL007C:FUS3/YBL016W:RPL19B/YBL027W:SKT5/YBL061C:RPS8A/YBL072C:RPL23A/YBL087C:RPL32/YBL092W:PKC1/YBL105C:RPS11B/YBR048W:RPL19A/YBR084C-A:RFC5/YBR087W:HSL7/YBR133C:MAK5/YBR142W:SUP45/YBR143C:CDC28/YBR160W:EHT1/YBR177C:RPS6B/YBR181C:RPS9B/YBR189W:RPL21A/YBR191W:RGD1/YBR260C:LSB5/YCL034W:BUD23/YCR047C…
43232	intracellular non-membrane-bounded organelle	236 out of 610 genes, 38.7%	1361 out of 7165 background genes, 19.0%	2.74e-30	0.00	0.00	FUN30/YAL019W:CCR4/YAL021C:MAK16/YAL025C:MYO4/YAL029C:FUN12/YAL035W:RBG1/YAL036C:UTP20/YBL004W:SLA1/YBL007C:FUS3/YBL016W:RPL19B/YBL027W:SKT5/YBL061C:RPS8A/YBL072C:RPL23A/YBL087C:RPL32/YBL092W:PKC1/YBL105C:RPS11B/YBR048W:RPL19A/YBR084C-A:RFC5/YBR087W:HSL7/YBR133C:MAK5/YBR142W:SUP45/YBR143C:CDC28/YBR160W:EHT1/YBR177C:RPS6B/YBR181C:RPS9B/YBR189W:RPL21A/YBR191W:RGD1/YBR260C:LSB5/YCL034W:BUD23/YCR047C…
30684	preribosome	72 out of 610 genes, 11.8%	183 out of 7165 background genes, 2.6%	1.16e-28	0.00	0.00	MAK16/YAL025C:FUN12/YAL035W:UTP20/YBL004W:RPL19B/YBL027W:RPS8A/YBL072C:RPS11B/YBR048W:RPS6B/YBR181C:RPS9B/YBR189W:PWP2/YCR057C:RPL35B/YDL136W:NOP14/YDL148C:RPL35A/YDL191W:RPS11A/YDR025W:RPS13/YDR064W:RRP8/YDR083W:RLI1/YDR091C:UTP4/YDR324C:UTP6/YDR449C:NUG1/YER006W:ARB1/YER036C:RPS8B/YER102W:NSA2/YER126C:SPB4/YFL002C:DBP3/YGL078C:RPL28/YGL103W:RPS2/YGL123W:UTP22/YGR090W:NOP7/YGR103W:RPS0A/YGR214W:…
22627	cytosolic small ribosomal subunit	42 out of 610 genes, 6.9%	65 out of 7165 background genes, 0.9%	3.97e-27	0.00	0.00	FUN12/YAL035W:RPS8A/YBL072C:RPS11B/YBR048W:RPS6B/YBR181C:RPS9B/YBR189W:RPS16B/YDL083C:RPS11A/YDR025W:RPS13/YDR064W:RPS17B/YDR447C:RPS18A/YDR450W:RPS24A/YER074W:RPS8B/YER102W:RPS26B/YER131W:RPS2/YGL123W:RPS26A/YGL189C:RPS25A/YGR027C:RPS23A/YGR118W:RPS0A/YGR214W:RPS20/YHL015W:RPS4B/YHR203C:RPS24B/YIL069C:RPS22A/YJL190C:RPS14B/YJL191W:RPS4A/YJR145C:RPS0B/YLR048W:RPS30A/YLR287C-A:RPS25B/YLR333C:RPS1A…
1990904	ribonucleoprotein complex	164 out of 610 genes, 26.9%	810 out of 7165 background genes, 11.3%	8.55e-27	0.00	0.00	CCR4/YAL021C:MAK16/YAL025C:FUN12/YAL035W:RBG1/YAL036C:UTP20/YBL004W:FUS3/YBL016W:RPL19B/YBL027W:RPS8A/YBL072C:RPL23A/YBL087C:RPL32/YBL092W:RPS11B/YBR048W:RPL19A/YBR084C-A:SUP45/YBR143C:CDC28/YBR160W:RPS6B/YBR181C:RPS9B/YBR189W:RPL21A/YBR191W:PWP2/YCR057C:NAT1/YDL040C:RPL31A/YDL075W:RPS16B/YDL083C:SUB2/YDL084W:RPL35B/YDL136W:NOP14/YDL148C:RPL35A/YDL191W:SSB1/YDL229W:RPS11A/YDR025W:RPS13/YDR064W:RR…
30529	intracellular ribonucleoprotein complex	164 out of 610 genes, 26.9%	810 out of 7165 background genes, 11.3%	8.55e-27	0.00	0.00	CCR4/YAL021C:MAK16/YAL025C:FUN12/YAL035W:RBG1/YAL036C:UTP20/YBL004W:FUS3/YBL016W:RPL19B/YBL027W:RPS8A/YBL072C:RPL23A/YBL087C:RPL32/YBL092W:RPS11B/YBR048W:RPL19A/YBR084C-A:SUP45/YBR143C:CDC28/YBR160W:RPS6B/YBR181C:RPS9B/YBR189W:RPL21A/YBR191W:PWP2/YCR057C:NAT1/YDL040C:RPL31A/YDL075W:RPS16B/YDL083C:SUB2/YDL084W:RPL35B/YDL136W:NOP14/YDL148C:RPL35A/YDL191W:SSB1/YDL229W:RPS11A/YDR025W:RPS13/YDR064W:RR…
5829	cytosol	185 out of 610 genes, 30.3%	1008 out of 7165 background genes, 14.1%	3.46e-25	0.00	0.00	FUN12/YAL035W:RPL19B/YBL027W:RPS8A/YBL072C:ILS1/YBL076C:RPL23A/YBL087C:RPL32/YBL092W:RPS11B/YBR048W:SEC18/YBR080C:RPL19A/YBR084C-A:RPS6B/YBR181C:RPS9B/YBR189W:RPL21A/YBR191W:SDS24/YBR214W:PYC2/YBR218C:LSB5/YCL034W:KAR4/YCL055W:RHB1/YCR027C:NAT1/YDL040C:RPL31A/YDL075W:RPS16B/YDL083C:RPL35B/YDL136W:ARF2/YDL137W:CCT4/YDL143W:RPN5/YDL147W:RPL35A/YDL191W:ARF1/YDL192W:RPS11A/YDR025W:RPS13/YDR064W:RLI1/…
5840	ribosome	93 out of 610 genes, 15.2%	360 out of 7165 background genes, 5.0%	1.78e-21	0.00	0.00	FUN12/YAL035W:RBG1/YAL036C:RPL19B/YBL027W:RPS8A/YBL072C:RPL23A/YBL087C:RPL32/YBL092W:RPS11B/YBR048W:RPL19A/YBR084C-A:CDC28/YBR160W:RPS6B/YBR181C:RPS9B/YBR189W:RPL21A/YBR191W:NAT1/YDL040C:RPL31A/YDL075W:RPS16B/YDL083C:RPL35B/YDL136W:RPL35A/YDL191W:RPS11A/YDR025W:RPS13/YDR064W:RLI1/YDR091C:RPS17B/YDR447C:RPS18A/YDR450W:TMA20/YER007C-A:ARB1/YER036C:RPS24A/YER074W:RPS8B/YER102W:RPL23B/YER117W:RPS26B/…
5737	cytoplasm	480 out of 610 genes, 78.7%	4327 out of 7165 background genes, 60.4%	3.09e-21	0.00	0.00	VPS8/YAL002W:CYS3/YAL012W:FUN30/YAL019W:CCR4/YAL021C:MYO4/YAL029C:FUN12/YAL035W:RBG1/YAL036C:CDC19/YAL038W:GDH3/YAL062W:SWH1/YAR042W:UTP20/YBL004W:SLA1/YBL007C:FUS3/YBL016W:RPL19B/YBL027W:APL3/YBL037W:URA7/YBL039C:SKT5/YBL061C:RPS8A/YBL072C:ILS1/YBL076C:RPL23A/YBL087C:TEL1/YBL088C:RPL32/YBL092W:SEA4/YBL104C:PKC1/YBL105C:NTH2/YBR001C:IPP1/YBR011C:OLA1/YBR025C:YPK3/YBR028C:ZTA1/YBR046C:RPS11B/YBR04…
43234	protein complex	186 out of 610 genes, 30.5%	1147 out of 7165 background genes, 16.0%	1.55e-18	0.00	0.00	VPS8/YAL002W:CCR4/YAL021C:MYO4/YAL029C:APL3/YBL037W:SEA4/YBL104C:RFC5/YBR087W:EXO84/YBR102C:SUP45/YBR143C:CDC28/YBR160W:APM3/YBR288C:TAF2/YCR042C:PWP2/YCR057C:MSH3/YCR092C:CDC39/YCR093W:RPT2/YDL007W:CDC7/YDL017W:ARP2/YDL029W:VAM6/YDL077C:SUB2/YDL084W:CYK3/YDL117W:CCT4/YDL143W:COP1/YDL145C:RPN5/YDL147W:NOP14/YDL148C:GLE1/YDL207W:FAL1/YDR021W:VPS54/YDR027C:VPS41/YDR080W:TRS85/YDR108W:MTC5/YDR128W:E…
30686	90S preribosome	41 out of 610 genes, 6.7%	90 out of 7165 background genes, 1.3%	1.92e-18	0.00	0.00	UTP20/YBL004W:RPS8A/YBL072C:RPS11B/YBR048W:RPS9B/YBR189W:PWP2/YCR057C:NOP14/YDL148C:RPS11A/YDR025W:RPS13/YDR064W:RRP8/YDR083W:UTP4/YDR324C:UTP6/YDR449C:RPS8B/YER102W:SPB4/YFL002C:UTP22/YGR090W:NOP7/YGR103W:RPS0A/YGR214W:DBP8/YHR169W:RPS4B/YHR203C:CKA1/YIL035C:UTP10/YJL109C:RPS4A/YJR145C:DIP2/YLR129W:UTP21/YLR409C:RPS1A/YLR441C:RPS1B/YML063W:ERB1/YMR049C:UTP15/YMR093W:RPS16A/YMR143W:HAS1/YMR290C:I…
44391	ribosomal subunit	71 out of 610 genes, 11.6%	250 out of 7165 background genes, 3.5%	2.09e-18	0.00	0.00	FUN12/YAL035W:RPL19B/YBL027W:RPS8A/YBL072C:RPL23A/YBL087C:RPL32/YBL092W:RPS11B/YBR048W:RPL19A/YBR084C-A:RPS6B/YBR181C:RPS9B/YBR189W:RPL21A/YBR191W:RPL31A/YDL075W:RPS16B/YDL083C:RPL35B/YDL136W:RPL35A/YDL191W:RPS11A/YDR025W:RPS13/YDR064W:RPS17B/YDR447C:RPS18A/YDR450W:RPS24A/YER074W:RPS8B/YER102W:RPL23B/YER117W:RPS26B/YER131W:RPL24A/YGL031C:RPL28/YGL103W:RPS2/YGL123W:RPL9A/YGL147C:RPS26A/YGL189C:RPS…
15935	small ribosomal subunit	42 out of 610 genes, 6.9%	100 out of 7165 background genes, 1.4%	2.86e-17	0.00	0.00	FUN12/YAL035W:RPS8A/YBL072C:RPS11B/YBR048W:RPS6B/YBR181C:RPS9B/YBR189W:RPS16B/YDL083C:RPS11A/YDR025W:RPS13/YDR064W:RPS17B/YDR447C:RPS18A/YDR450W:RPS24A/YER074W:RPS8B/YER102W:RPS26B/YER131W:RPS2/YGL123W:RPS26A/YGL189C:RPS25A/YGR027C:RPS23A/YGR118W:RPS0A/YGR214W:RPS20/YHL015W:RPS4B/YHR203C:RPS24B/YIL069C:RPS22A/YJL190C:RPS14B/YJL191W:RPS4A/YJR145C:RPS0B/YLR048W:RPS30A/YLR287C-A:RPS25B/YLR333C:RPS1A…
1905369	endopeptidase complex	26 out of 610 genes, 4.3%	49 out of 7165 background genes, 0.7%	3.01e-13	0.00	0.00	RPT2/YDL007W:RPN5/YDL147W:RPT3/YDR394W:RPN9/YDR427W:PRE1/YER012W:RPN3/YER021W:PUP3/YER094C:RPN11/YFR004W:UBP6/YFR010W:SCL1/YGL011C:RPT6/YGL048C:ECM29/YHL030W:RPN1/YHR027C:RPN2/YIL075C:PRE3/YJL001W:RPT1/YKL145W:RPN13/YLR421C:PRE8/YML092C:PRE5/YMR314W:PRE6/YOL038W:RPT5/YOR117W:PUP1/YOR157C:RPT4/YOR259C:RPN8/YOR261C:PRE10/YOR362C:PRE2/YPR103W
502	proteasome complex	26 out of 610 genes, 4.3%	49 out of 7165 background genes, 0.7%	3.01e-13	0.00	0.00	RPT2/YDL007W:RPN5/YDL147W:RPT3/YDR394W:RPN9/YDR427W:PRE1/YER012W:RPN3/YER021W:PUP3/YER094C:RPN11/YFR004W:UBP6/YFR010W:SCL1/YGL011C:RPT6/YGL048C:ECM29/YHL030W:RPN1/YHR027C:RPN2/YIL075C:PRE3/YJL001W:RPT1/YKL145W:RPN13/YLR421C:PRE8/YML092C:PRE5/YMR314W:PRE6/YOL038W:RPT5/YOR117W:PUP1/YOR157C:RPT4/YOR259C:RPN8/YOR261C:PRE10/YOR362C:PRE2/YPR103W
99023	tethering complex	23 out of 610 genes, 3.8%	42 out of 7165 background genes, 0.6%	5.80e-12	0.00	0.00	VPS8/YAL002W:EXO84/YBR102C:VAM6/YDL077C:VPS54/YDR027C:VPS41/YDR080W:TRS85/YDR108W:SEC5/YDR166C:TRS23/YDR246W:TRS120/YDR407C:TRS31/YDR472W:VPS52/YDR484W:SEC3/YER008C:SEC15/YGL233W:SEC6/YIL068C:VPS53/YJL029C:EXO70/YJL085W:PEP3/YLR148W:SEC10/YLR166C:VPS33/YLR396C:TRS130/YMR218C:PEP5/YMR231W:VPS16/YPL045W:SEC8/YPR055W
30687	preribosome, large subunit precursor	33 out of 610 genes, 5.4%	86 out of 7165 background genes, 1.2%	6.87e-12	0.00	0.00	MAK16/YAL025C:FUN12/YAL035W:RPL19B/YBL027W:RPL35B/YDL136W:RPL35A/YDL191W:RRP8/YDR083W:RLI1/YDR091C:NUG1/YER006W:ARB1/YER036C:NSA2/YER126C:SPB4/YFL002C:DBP3/YGL078C:RPL28/YGL103W:NOP7/YGR103W:IPI1/YHR085W:RPF1/YHR088W:NMD3/YHR170W:YVH1/YIR026C:RPL17B/YJL177W:RPL17A/YKL180W:DRS1/YLL008W:BUD20/YLR074C:MDN1/YLR106C:REH1/YLR387C:ERB1/YMR049C:HAS1/YMR290C:NOG2/YNR053C:RPL3/YOR063W:YTM1/YOR272W:RRS1/YOR…
31597	cytosolic proteasome complex	18 out of 610 genes, 3.0%	26 out of 7165 background genes, 0.4%	1.30e-11	0.00	0.00	RPN5/YDL147W:RPN9/YDR427W:PRE1/YER012W:PUP3/YER094C:RPN11/YFR004W:SCL1/YGL011C:RPT6/YGL048C:RPN1/YHR027C:RPN2/YIL075C:PRE3/YJL001W:RPN13/YLR421C:PRE8/YML092C:PRE5/YMR314W:PRE6/YOL038W:PUP1/YOR157C:RPN8/YOR261C:PRE10/YOR362C:PRE2/YPR103W
34515	proteasome storage granule	18 out of 610 genes, 3.0%	26 out of 7165 background genes, 0.4%	1.30e-11	0.00	0.00	RPN5/YDL147W:RPN9/YDR427W:PRE1/YER012W:PUP3/YER094C:RPN11/YFR004W:SCL1/YGL011C:RPT6/YGL048C:RPN1/YHR027C:RPN2/YIL075C:PRE3/YJL001W:RPN13/YLR421C:PRE8/YML092C:PRE5/YMR314W:PRE6/YOL038W:PUP1/YOR157C:RPN8/YOR261C:PRE10/YOR362C:PRE2/YPR103W
44444	cytoplasmic part	376 out of 610 genes, 61.6%	3398 out of 7165 background genes, 47.4%	4.52e-11	0.00	0.00	VPS8/YAL002W:FUN30/YAL019W:CCR4/YAL021C:MYO4/YAL029C:FUN12/YAL035W:RBG1/YAL036C:GDH3/YAL062W:SWH1/YAR042W:SLA1/YBL007C:FUS3/YBL016W:RPL19B/YBL027W:APL3/YBL037W:URA7/YBL039C:SKT5/YBL061C:RPS8A/YBL072C:ILS1/YBL076C:RPL23A/YBL087C:TEL1/YBL088C:RPL32/YBL092W:SEA4/YBL104C:NTH2/YBR001C:RPS11B/YBR048W:SEC18/YBR080C:RPL19A/YBR084C-A:EXO84/YBR102C:GRS1/YBR121C:TPS1/YBR126C:OPY1/YBR129C:HSL7/YBR133C:MEC1/Y…
1905368	peptidase complex	28 out of 610 genes, 4.6%	77 out of 7165 background genes, 1.1%	3.19e-09	0.00	0.00	RPT2/YDL007W:RPN5/YDL147W:RPT3/YDR394W:RPN9/YDR427W:PRE1/YER012W:RPN3/YER021W:PUP3/YER094C:RPN11/YFR004W:UBP6/YFR010W:SCL1/YGL011C:RPT6/YGL048C:GCN5/YGR252W:ECM29/YHL030W:RPN1/YHR027C:TRA1/YHR099W:RPN2/YIL075C:PRE3/YJL001W:RPT1/YKL145W:RPN13/YLR421C:PRE8/YML092C:PRE5/YMR314W:PRE6/YOL038W:RPT5/YOR117W:PUP1/YOR157C:RPT4/YOR259C:RPN8/YOR261C:PRE10/YOR362C:PRE2/YPR103W
43229	intracellular organelle	467 out of 610 genes, 76.6%	4616 out of 7165 background genes, 64.4%	4.00e-09	0.00	0.00	VPS8/YAL002W:CYS3/YAL012W:FUN30/YAL019W:CCR4/YAL021C:MAK16/YAL025C:MYO4/YAL029C:FUN12/YAL035W:RBG1/YAL036C:GDH3/YAL062W:SWH1/YAR042W:UTP20/YBL004W:SLA1/YBL007C:FUS3/YBL016W:RPL19B/YBL027W:APL3/YBL037W:URA7/YBL039C:SKT5/YBL061C:RPS8A/YBL072C:RPL23A/YBL087C:TEL1/YBL088C:RPL32/YBL092W:SEA4/YBL104C:PKC1/YBL105C:NTH2/YBR001C:IPP1/YBR011C:ZTA1/YBR046C:RPS11B/YBR048W:SEC18/YBR080C:RPL19A/YBR084C-A:RFC5/…
43226	organelle	467 out of 610 genes, 76.6%	4617 out of 7165 background genes, 64.4%	4.20e-09	0.00	0.00	VPS8/YAL002W:CYS3/YAL012W:FUN30/YAL019W:CCR4/YAL021C:MAK16/YAL025C:MYO4/YAL029C:FUN12/YAL035W:RBG1/YAL036C:GDH3/YAL062W:SWH1/YAR042W:UTP20/YBL004W:SLA1/YBL007C:FUS3/YBL016W:RPL19B/YBL027W:APL3/YBL037W:URA7/YBL039C:SKT5/YBL061C:RPS8A/YBL072C:RPL23A/YBL087C:TEL1/YBL088C:RPL32/YBL092W:SEA4/YBL104C:PKC1/YBL105C:NTH2/YBR001C:IPP1/YBR011C:ZTA1/YBR046C:RPS11B/YBR048W:SEC18/YBR080C:RPL19A/YBR084C-A:RFC5/…
44422	organelle part	308 out of 610 genes, 50.5%	2709 out of 7165 background genes, 37.8%	6.69e-09	0.00	0.00	VPS8/YAL002W:FUN30/YAL019W:CCR4/YAL021C:MAK16/YAL025C:MYO4/YAL029C:FUN12/YAL035W:SWH1/YAR042W:UTP20/YBL004W:SLA1/YBL007C:RPL19B/YBL027W:APL3/YBL037W:SKT5/YBL061C:RPS8A/YBL072C:RPL23A/YBL087C:RPL32/YBL092W:SEA4/YBL104C:PKC1/YBL105C:RPS11B/YBR048W:RPL19A/YBR084C-A:RFC5/YBR087W:HSL7/YBR133C:MAK5/YBR142W:CDC28/YBR160W:EHT1/YBR177C:RPS6B/YBR181C:RPS9B/YBR189W:RPL21A/YBR191W:RGD1/YBR260C:LSB5/YCL034W:T…
22624	proteasome accessory complex	15 out of 610 genes, 2.5%	23 out of 7165 background genes, 0.3%	7.17e-09	0.00	0.00	RPT2/YDL007W:RPN5/YDL147W:RPT3/YDR394W:RPN9/YDR427W:RPN3/YER021W:RPN11/YFR004W:UBP6/YFR010W:RPT6/YGL048C:RPN1/YHR027C:RPN2/YIL075C:RPT1/YKL145W:RPN13/YLR421C:RPT5/YOR117W:RPT4/YOR259C:RPN8/YOR261C
5838	proteasome regulatory particle	15 out of 610 genes, 2.5%	23 out of 7165 background genes, 0.3%	7.17e-09	0.00	0.00	RPT2/YDL007W:RPN5/YDL147W:RPT3/YDR394W:RPN9/YDR427W:RPN3/YER021W:RPN11/YFR004W:UBP6/YFR010W:RPT6/YGL048C:RPN1/YHR027C:RPN2/YIL075C:RPT1/YKL145W:RPN13/YLR421C:RPT5/YOR117W:RPT4/YOR259C:RPN8/YOR261C
44446	intracellular organelle part	307 out of 610 genes, 50.3%	2700 out of 7165 background genes, 37.7%	7.50e-09	0.00	0.00	VPS8/YAL002W:FUN30/YAL019W:CCR4/YAL021C:MAK16/YAL025C:MYO4/YAL029C:FUN12/YAL035W:SWH1/YAR042W:UTP20/YBL004W:SLA1/YBL007C:RPL19B/YBL027W:APL3/YBL037W:SKT5/YBL061C:RPS8A/YBL072C:RPL23A/YBL087C:RPL32/YBL092W:SEA4/YBL104C:PKC1/YBL105C:RPS11B/YBR048W:RPL19A/YBR084C-A:RFC5/YBR087W:HSL7/YBR133C:MAK5/YBR142W:CDC28/YBR160W:EHT1/YBR177C:RPS6B/YBR181C:RPS9B/YBR189W:RPL21A/YBR191W:RGD1/YBR260C:LSB5/YCL034W:T…
30427	site of polarized growth	54 out of 610 genes, 8.9%	262 out of 7165 background genes, 3.7%	1.60e-07	0.00	0.00	MYO4/YAL029C:SLA1/YBL007C:FUS3/YBL016W:APL3/YBL037W:SKT5/YBL061C:PKC1/YBL105C:SEC18/YBR080C:EXO84/YBR102C:HSL7/YBR133C:CDC28/YBR160W:RGD1/YBR260C:CYK3/YDL117W:STE7/YDL159W:ENT1/YDL161W:SAC6/YDR129C:SEC5/YDR166C:RVS167/YDR388W:GIN4/YDR507C:SEC3/YER008C:RSP5/YER125W:GLC7/YER133W:BEM2/YER155C:MOB2/YFL034C-B:RGD2/YFL047W:SEC15/YGL233W:DBF2/YGR092W:YAP1802/YGR241C:KIC1/YHR102W:YAP1801/YHR161C:SEC6/YIL…
44433	cytoplasmic vesicle part	29 out of 610 genes, 4.8%	95 out of 7165 background genes, 1.3%	1.77e-07	0.00	0.00	VPS8/YAL002W:APL3/YBL037W:COP1/YDL145C:VPS54/YDR027C:ENT5/YDR153C:SEC26/YDR238C:TRS23/YDR246W:TRS120/YDR407C:TRS31/YDR472W:VPS52/YDR484W:RSP5/YER125W:FAB1/YFR019W:RET2/YFR051C:SEC27/YGL137W:VPS53/YJL029C:LAA1/YJL207C:APL2/YKL135C:PEP3/YLR148W:VPS33/YLR396C:GTR1/YML121W:TRS130/YMR218C:PEP5/YMR231W:LST8/YNL006W:SFB2/YNL049C:SEC21/YNL287W:MON2/YNL297C:RET3/YPL010W:VPS16/YPL045W:SAR1/YPL218W
22625	cytosolic large ribosomal subunit	29 out of 610 genes, 4.8%	99 out of 7165 background genes, 1.4%	5.24e-07	0.00	0.00	RPL19B/YBL027W:RPL23A/YBL087C:RPL32/YBL092W:RPL19A/YBR084C-A:RPL21A/YBR191W:RPL31A/YDL075W:RPL35B/YDL136W:RPL35A/YDL191W:RPL23B/YER117W:RPL24A/YGL031C:RPL28/YGL103W:RPL9A/YGL147C:RPL26B/YGR034W:NMD3/YHR170W:RPL17B/YJL177W:RPL39/YJL189W:RPL43B/YJR094W-A:RPL17A/YKL180W:RPL15A/YLR029C:RPL10/YLR075W:RPL26A/YLR344W:REH1/YLR387C:RPL31B/YLR406C:RPL9B/YNL067W:RPL3/YOR063W:RPL21B/YPL079W:RPL5/YPL131W:RPL3…
145	exocyst	8 out of 610 genes, 1.3%	8 out of 7165 background genes, 0.1%	9.71e-07	0.00	0.00	EXO84/YBR102C:SEC5/YDR166C:SEC3/YER008C:SEC15/YGL233W:SEC6/YIL068C:EXO70/YJL085W:SEC10/YLR166C:SEC8/YPR055W
32040	small-subunit processome	20 out of 610 genes, 3.3%	53 out of 7165 background genes, 0.7%	1.49e-06	0.00	0.00	UTP20/YBL004W:RPS6B/YBR181C:RPS9B/YBR189W:PWP2/YCR057C:NOP14/YDL148C:UTP4/YDR324C:UTP6/YDR449C:RPS2/YGL123W:UTP22/YGR090W:UTP10/YJL109C:RPS14B/YJL191W:DIP2/YLR129W:UTP21/YLR409C:UTP15/YMR093W:IMP4/YNL075W:RPS7B/YNL096C:RPS7A/YOR096W:RPS6A/YPL090C:NAN1/YPL126W:NOC4/YPR144C
5938	cell cortex	35 out of 610 genes, 5.7%	147 out of 7165 background genes, 2.1%	4.63e-06	0.00	0.00	SLA1/YBL007C:SKT5/YBL061C:EXO84/YBR102C:HSL7/YBR133C:RGD1/YBR260C:LSB5/YCL034W:CYK3/YDL117W:SAC6/YDR129C:SEC5/YDR166C:DPL1/YDR294C:RVS167/YDR388W:PKH1/YDR490C:SEC3/YER008C:BEM2/YER155C:SEC15/YGL233W:YPP1/YGR198W:YAP1802/YGR241C:OSH3/YHR073W:YAP1801/YHR161C:SEC6/YIL068C:BBC1/YJL020C:EXO70/YJL085W:ARP3/YJR065C:CAP1/YKL007W:DYN1/YKR054C:SEC10/YLR166C:MYO5/YMR109W:DMA2/YNL116W:SRV2/YNL138W:SLA2/YNL24…
99568	cytoplasmic region	35 out of 610 genes, 5.7%	147 out of 7165 background genes, 2.1%	4.63e-06	0.00	0.00	SLA1/YBL007C:SKT5/YBL061C:EXO84/YBR102C:HSL7/YBR133C:RGD1/YBR260C:LSB5/YCL034W:CYK3/YDL117W:SAC6/YDR129C:SEC5/YDR166C:DPL1/YDR294C:RVS167/YDR388W:PKH1/YDR490C:SEC3/YER008C:BEM2/YER155C:SEC15/YGL233W:YPP1/YGR198W:YAP1802/YGR241C:OSH3/YHR073W:YAP1801/YHR161C:SEC6/YIL068C:BBC1/YJL020C:EXO70/YJL085W:ARP3/YJR065C:CAP1/YKL007W:DYN1/YKR054C:SEC10/YLR166C:MYO5/YMR109W:DMA2/YNL116W:SRV2/YNL138W:SLA2/YNL24…
5933	cellular bud	48 out of 610 genes, 7.9%	241 out of 7165 background genes, 3.4%	5.06e-06	0.00	0.00	LTE1/YAL024C:MYO4/YAL029C:SLA1/YBL007C:APL3/YBL037W:SKT5/YBL061C:PKC1/YBL105C:EXO84/YBR102C:HSL7/YBR133C:CDC28/YBR160W:RGD1/YBR260C:CYK3/YDL117W:ENT1/YDL161W:SAC6/YDR129C:SEC5/YDR166C:GIN4/YDR507C:SEC3/YER008C:RSP5/YER125W:GLC7/YER133W:BEM2/YER155C:MOB2/YFL034C-B:RGD2/YFL047W:SEC15/YGL233W:DBF2/YGR092W:YAP1802/YGR241C:KIC1/YHR102W:YAP1801/YHR161C:SEC6/YIL068C:MOB1/YIL106W:TAO3/YIL129C:EXO70/YJL08…
44430	cytoskeletal part	42 out of 610 genes, 6.9%	197 out of 7165 background genes, 2.7%	5.41e-06	0.00	0.00	MYO4/YAL029C:SLA1/YBL007C:SKT5/YBL061C:PKC1/YBL105C:HSL7/YBR133C:CDC28/YBR160W:RGD1/YBR260C:LSB5/YCL034W:ARP2/YDL029W:CYK3/YDL117W:SAC6/YDR129C:RVS167/YDR388W:PAC11/YDR488C:GLC7/YER133W:CDC14/YFR028C:DBF2/YGR092W:YPP1/YGR198W:YAP1802/YGR241C:YAP1801/YHR161C:MOB1/YIL106W:BBC1/YJL020C:ARP3/YJR065C:CAP1/YKL007W:ARC19/YKL013C:DYN1/YKR054C:TUB4/YLR212C:ARC18/YLR370C:TEM1/YML064C:TUB1/YML085C:TUB3/YML1…
44463	cell projection part	31 out of 610 genes, 5.1%	122 out of 7165 background genes, 1.7%	6.25e-06	0.00	0.00	SLA1/YBL007C:FUS3/YBL016W:SEC18/YBR080C:EXO84/YBR102C:RGD1/YBR260C:STE7/YDL159W:ENT1/YDL161W:SAC6/YDR129C:SEC5/YDR166C:RVS167/YDR388W:SEC3/YER008C:GLC7/YER133W:BEM2/YER155C:MOB2/YFL034C-B:SEC15/YGL233W:KIC1/YHR102W:SEC6/YIL068C:TAO3/YIL129C:EXO70/YJL085W:CAP1/YKL007W:HYM1/YKL189W:SEC10/YLR166C:ENT2/YLR206W:ROM2/YLR371W:MYO5/YMR109W:SRV2/YNL138W:SLA2/YNL243W:MYO2/YOR326W:SRO7/YPR032W:SEC8/YPR055W:…
44448	cell cortex part	31 out of 610 genes, 5.1%	123 out of 7165 background genes, 1.7%	7.70e-06	0.00	0.00	SLA1/YBL007C:SKT5/YBL061C:EXO84/YBR102C:HSL7/YBR133C:RGD1/YBR260C:LSB5/YCL034W:CYK3/YDL117W:SAC6/YDR129C:SEC5/YDR166C:DPL1/YDR294C:RVS167/YDR388W:SEC3/YER008C:SEC15/YGL233W:YPP1/YGR198W:YAP1802/YGR241C:OSH3/YHR073W:YAP1801/YHR161C:SEC6/YIL068C:BBC1/YJL020C:EXO70/YJL085W:ARP3/YJR065C:CAP1/YKL007W:SEC10/YLR166C:MYO5/YMR109W:DMA2/YNL116W:SRV2/YNL138W:SLA2/YNL243W:MSB3/YNL293W:INP53/YOR109W:SCP1/YOR3…
31410	cytoplasmic vesicle	47 out of 610 genes, 7.7%	237 out of 7165 background genes, 3.3%	8.32e-06	0.00	0.00	VPS8/YAL002W:SWH1/YAR042W:APL3/YBL037W:COP1/YDL145C:ENT1/YDL161W:VPS54/YDR027C:VPS41/YDR080W:TRS85/YDR108W:DOP1/YDR141C:ENT5/YDR153C:SEC26/YDR238C:TRS23/YDR246W:TRS120/YDR407C:TRS31/YDR472W:VPS52/YDR484W:RSP5/YER125W:FAB1/YFR019W:RET2/YFR051C:SEC27/YGL137W:YPP1/YGR198W:CPD1/YGR247W:VPS29/YHR012W:VPS53/YJL029C:SNX4/YJL036W:VPS35/YJL154C:LAA1/YJL207C:APL2/YKL135C:VPS13/YLL040C:PEP3/YLR148W:VPS33/YL…
97708	intracellular vesicle	47 out of 610 genes, 7.7%	237 out of 7165 background genes, 3.3%	8.32e-06	0.00	0.00	VPS8/YAL002W:SWH1/YAR042W:APL3/YBL037W:COP1/YDL145C:ENT1/YDL161W:VPS54/YDR027C:VPS41/YDR080W:TRS85/YDR108W:DOP1/YDR141C:ENT5/YDR153C:SEC26/YDR238C:TRS23/YDR246W:TRS120/YDR407C:TRS31/YDR472W:VPS52/YDR484W:RSP5/YER125W:FAB1/YFR019W:RET2/YFR051C:SEC27/YGL137W:YPP1/YGR198W:CPD1/YGR247W:VPS29/YHR012W:VPS53/YJL029C:SNX4/YJL036W:VPS35/YJL154C:LAA1/YJL207C:APL2/YKL135C:VPS13/YLL040C:PEP3/YLR148W:VPS33/YL…
43332	mating projection tip	30 out of 610 genes, 4.9%	117 out of 7165 background genes, 1.6%	8.53e-06	0.00	0.00	SLA1/YBL007C:FUS3/YBL016W:SEC18/YBR080C:EXO84/YBR102C:RGD1/YBR260C:STE7/YDL159W:ENT1/YDL161W:SAC6/YDR129C:SEC5/YDR166C:RVS167/YDR388W:SEC3/YER008C:BEM2/YER155C:MOB2/YFL034C-B:SEC15/YGL233W:KIC1/YHR102W:SEC6/YIL068C:TAO3/YIL129C:EXO70/YJL085W:CAP1/YKL007W:HYM1/YKL189W:SEC10/YLR166C:ENT2/YLR206W:ROM2/YLR371W:MYO5/YMR109W:SRV2/YNL138W:SLA2/YNL243W:MYO2/YOR326W:SRO7/YPR032W:SEC8/YPR055W:AXL1/YPR122W
5856	cytoskeleton	42 out of 610 genes, 6.9%	200 out of 7165 background genes, 2.8%	8.61e-06	0.00	0.00	MYO4/YAL029C:SLA1/YBL007C:SKT5/YBL061C:PKC1/YBL105C:HSL7/YBR133C:CDC28/YBR160W:RGD1/YBR260C:LSB5/YCL034W:ARP2/YDL029W:CYK3/YDL117W:SAC6/YDR129C:RVS167/YDR388W:PAC11/YDR488C:GLC7/YER133W:CDC14/YFR028C:DBF2/YGR092W:YPP1/YGR198W:YAP1802/YGR241C:YAP1801/YHR161C:MOB1/YIL106W:BBC1/YJL020C:ARP3/YJR065C:CAP1/YKL007W:ARC19/YKL013C:DYN1/YKR054C:TUB4/YLR212C:ARC18/YLR370C:TEM1/YML064C:TUB1/YML085C:TUB3/YML1…
31982	vesicle	47 out of 610 genes, 7.7%	239 out of 7165 background genes, 3.3%	1.09e-05	0.00	0.00	VPS8/YAL002W:SWH1/YAR042W:APL3/YBL037W:COP1/YDL145C:ENT1/YDL161W:VPS54/YDR027C:VPS41/YDR080W:TRS85/YDR108W:DOP1/YDR141C:ENT5/YDR153C:SEC26/YDR238C:TRS23/YDR246W:TRS120/YDR407C:TRS31/YDR472W:VPS52/YDR484W:RSP5/YER125W:FAB1/YFR019W:RET2/YFR051C:SEC27/YGL137W:YPP1/YGR198W:CPD1/YGR247W:VPS29/YHR012W:VPS53/YJL029C:SNX4/YJL036W:VPS35/YJL154C:LAA1/YJL207C:APL2/YKL135C:VPS13/YLL040C:PEP3/YLR148W:VPS33/YL…
30117	membrane coat	15 out of 610 genes, 2.5%	34 out of 7165 background genes, 0.5%	1.11e-05	0.00	0.00	APL3/YBL037W:APM3/YBR288C:COP1/YDL145C:ENT5/YDR153C:SEC26/YDR238C:RET2/YFR051C:SEC27/YGL137W:APL6/YGR261C:LAA1/YJL207C:APL2/YKL135C:SFB2/YNL049C:SEC21/YNL287W:RET3/YPL010W:APL5/YPL195W:SAR1/YPL218W
48475	coated membrane	15 out of 610 genes, 2.5%	34 out of 7165 background genes, 0.5%	1.11e-05	0.00	0.00	APL3/YBL037W:APM3/YBR288C:COP1/YDL145C:ENT5/YDR153C:SEC26/YDR238C:RET2/YFR051C:SEC27/YGL137W:APL6/YGR261C:LAA1/YJL207C:APL2/YKL135C:SFB2/YNL049C:SEC21/YNL287W:RET3/YPL010W:APL5/YPL195W:SAR1/YPL218W
15629	actin cytoskeleton	23 out of 610 genes, 3.8%	77 out of 7165 background genes, 1.1%	1.79e-05	0.00	0.00	MYO4/YAL029C:SLA1/YBL007C:RGD1/YBR260C:LSB5/YCL034W:ARP2/YDL029W:CYK3/YDL117W:SAC6/YDR129C:RVS167/YDR388W:YPP1/YGR198W:YAP1802/YGR241C:YAP1801/YHR161C:BBC1/YJL020C:ARP3/YJR065C:CAP1/YKL007W:ARC19/YKL013C:ARC18/YLR370C:MYO5/YMR109W:SRV2/YNL138W:SLA2/YNL243W:ARC35/YNR035C:INP53/YOR109W:MYO2/YOR326W:SCP1/YOR367W
10494	cytoplasmic stress granule	25 out of 610 genes, 4.1%	89 out of 7165 background genes, 1.2%	1.83e-05	0.00	0.00	FUN12/YAL035W:RBG1/YAL036C:FUS3/YBL016W:SUP45/YBR143C:CDC28/YBR160W:SUP35/YDR172W:SAM2/YDR502C:ECM32/YER176W:LEU1/YGL009C:ARC1/YGL105W:GUS1/YGL245W:CYS4/YGR155W:RPS0A/YGR214W:YVH1/YIR026C:SUI2/YJR007W:TMA19/YKL056C:TEF4/YKL081W:TIF1/YKR059W:SAM1/YLR180W:YEF3/YLR249W:RPS30A/YLR287C-A:FAA4/YMR246W:MKT1/YNL085W:RIO2/YNL207W:SSB2/YNL209W
42995	cell projection	31 out of 610 genes, 5.1%	130 out of 7165 background genes, 1.8%	3.07e-05	0.00	0.00	SLA1/YBL007C:FUS3/YBL016W:SEC18/YBR080C:EXO84/YBR102C:RGD1/YBR260C:STE7/YDL159W:ENT1/YDL161W:SAC6/YDR129C:SEC5/YDR166C:RVS167/YDR388W:SEC3/YER008C:GLC7/YER133W:BEM2/YER155C:MOB2/YFL034C-B:SEC15/YGL233W:KIC1/YHR102W:SEC6/YIL068C:TAO3/YIL129C:EXO70/YJL085W:CAP1/YKL007W:HYM1/YKL189W:SEC10/YLR166C:ENT2/YLR206W:ROM2/YLR371W:MYO5/YMR109W:SRV2/YNL138W:SLA2/YNL243W:MYO2/YOR326W:SRO7/YPR032W:SEC8/YPR055W:…
5937	mating projection	31 out of 610 genes, 5.1%	130 out of 7165 background genes, 1.8%	3.07e-05	0.00	0.00	SLA1/YBL007C:FUS3/YBL016W:SEC18/YBR080C:EXO84/YBR102C:RGD1/YBR260C:STE7/YDL159W:ENT1/YDL161W:SAC6/YDR129C:SEC5/YDR166C:RVS167/YDR388W:SEC3/YER008C:GLC7/YER133W:BEM2/YER155C:MOB2/YFL034C-B:SEC15/YGL233W:KIC1/YHR102W:SEC6/YIL068C:TAO3/YIL129C:EXO70/YJL085W:CAP1/YKL007W:HYM1/YKL189W:SEC10/YLR166C:ENT2/YLR206W:ROM2/YLR371W:MYO5/YMR109W:SRV2/YNL138W:SLA2/YNL243W:MYO2/YOR326W:SRO7/YPR032W:SEC8/YPR055W:…
5839	proteasome core complex	10 out of 610 genes, 1.6%	16 out of 7165 background genes, 0.2%	3.41e-05	0.00	0.00	PRE1/YER012W:PUP3/YER094C:SCL1/YGL011C:PRE3/YJL001W:PRE8/YML092C:PRE5/YMR314W:PRE6/YOL038W:PUP1/YOR157C:PRE10/YOR362C:PRE2/YPR103W
35770	ribonucleoprotein granule	28 out of 610 genes, 4.6%	116 out of 7165 background genes, 1.6%	9.99e-05	0.00	0.00	CCR4/YAL021C:FUN12/YAL035W:RBG1/YAL036C:FUS3/YBL016W:SUP45/YBR143C:CDC28/YBR160W:SUP35/YDR172W:EBS1/YDR206W:SAM2/YDR502C:EDC3/YEL015W:ECM32/YER176W:LEU1/YGL009C:ARC1/YGL105W:GUS1/YGL245W:CYS4/YGR155W:RPS0A/YGR214W:YVH1/YIR026C:SUI2/YJR007W:TMA19/YKL056C:TEF4/YKL081W:TIF1/YKR059W:SAM1/YLR180W:YEF3/YLR249W:RPS30A/YLR287C-A:FAA4/YMR246W:MKT1/YNL085W:RIO2/YNL207W:SSB2/YNL209W
36464	cytoplasmic ribonucleoprotein granule	28 out of 610 genes, 4.6%	116 out of 7165 background genes, 1.6%	9.99e-05	0.00	0.00	CCR4/YAL021C:FUN12/YAL035W:RBG1/YAL036C:FUS3/YBL016W:SUP45/YBR143C:CDC28/YBR160W:SUP35/YDR172W:EBS1/YDR206W:SAM2/YDR502C:EDC3/YEL015W:ECM32/YER176W:LEU1/YGL009C:ARC1/YGL105W:GUS1/YGL245W:CYS4/YGR155W:RPS0A/YGR214W:YVH1/YIR026C:SUI2/YJR007W:TMA19/YKL056C:TEF4/YKL081W:TIF1/YKR059W:SAM1/YLR180W:YEF3/YLR249W:RPS30A/YLR287C-A:FAA4/YMR246W:MKT1/YNL085W:RIO2/YNL207W:SSB2/YNL209W
8540	proteasome regulatory particle, base subcomplex	8 out of 610 genes, 1.3%	11 out of 7165 background genes, 0.2%	0.00013	0.00	0.00	RPT2/YDL007W:RPT3/YDR394W:RPT6/YGL048C:RPN1/YHR027C:RPN2/YIL075C:RPT1/YKL145W:RPT5/YOR117W:RPT4/YOR259C
30897	HOPS complex	6 out of 610 genes, 1.0%	6 out of 7165 background genes, 0.1%	0.00014	0.00	0.00	VAM6/YDL077C:VPS41/YDR080W:PEP3/YLR148W:VPS33/YLR396C:PEP5/YMR231W:VPS16/YPL045W
5935	cellular bud neck	37 out of 610 genes, 6.1%	186 out of 7165 background genes, 2.6%	0.00025	0.00	0.00	SLA1/YBL007C:APL3/YBL037W:SKT5/YBL061C:PKC1/YBL105C:EXO84/YBR102C:HSL7/YBR133C:CDC28/YBR160W:CYK3/YDL117W:ENT1/YDL161W:SEC5/YDR166C:GIN4/YDR507C:SEC3/YER008C:GLC7/YER133W:MOB2/YFL034C-B:RGD2/YFL047W:SEC15/YGL233W:DBF2/YGR092W:YAP1802/YGR241C:YAP1801/YHR161C:SEC6/YIL068C:MOB1/YIL106W:EXO70/YJL085W:CAP1/YKL007W:YPK1/YKL126W:SEC10/YLR166C:DMA2/YNL116W:SLA2/YNL243W:MSB3/YNL293W:SSK2/YNR031C:CMR2/YOR0…
5768	endosome	31 out of 610 genes, 5.1%	143 out of 7165 background genes, 2.0%	0.00030	0.00	0.00	VPS8/YAL002W:SWH1/YAR042W:ENT1/YDL161W:VPS41/YDR080W:DOP1/YDR141C:ENT5/YDR153C:TRS23/YDR246W:TRS120/YDR407C:TRS31/YDR472W:RSP5/YER125W:FAB1/YFR019W:YPP1/YGR198W:VPS29/YHR012W:SNX4/YJL036W:VPS35/YJL154C:VPS13/YLL040C:PEP3/YLR148W:VPS33/YLR396C:GTR1/YML121W:MVP1/YMR004W:TRS130/YMR218C:PEP5/YMR231W:LST8/YNL006W:SEC21/YNL287W:MSB3/YNL293W:MON2/YNL297C:VPS5/YOR069W:VPS17/YOR132W:SNX3/YOR357C:VPS16/YPL…
30479	actin cortical patch	16 out of 610 genes, 2.6%	50 out of 7165 background genes, 0.7%	0.00073	0.00	0.00	SLA1/YBL007C:RGD1/YBR260C:LSB5/YCL034W:SAC6/YDR129C:RVS167/YDR388W:YPP1/YGR198W:YAP1802/YGR241C:YAP1801/YHR161C:BBC1/YJL020C:ARP3/YJR065C:CAP1/YKL007W:MYO5/YMR109W:SRV2/YNL138W:SLA2/YNL243W:INP53/YOR109W:SCP1/YOR367W
61645	endocytic patch	16 out of 610 genes, 2.6%	51 out of 7165 background genes, 0.7%	0.00098	0.00	0.00	SLA1/YBL007C:RGD1/YBR260C:LSB5/YCL034W:SAC6/YDR129C:RVS167/YDR388W:YPP1/YGR198W:YAP1802/YGR241C:YAP1801/YHR161C:BBC1/YJL020C:ARP3/YJR065C:CAP1/YKL007W:MYO5/YMR109W:SRV2/YNL138W:SLA2/YNL243W:INP53/YOR109W:SCP1/YOR367W
30120	vesicle coat	12 out of 610 genes, 2.0%	30 out of 7165 background genes, 0.4%	0.00099	0.00	0.00	APL3/YBL037W:COP1/YDL145C:ENT5/YDR153C:SEC26/YDR238C:RET2/YFR051C:SEC27/YGL137W:LAA1/YJL207C:APL2/YKL135C:SFB2/YNL049C:SEC21/YNL287W:RET3/YPL010W:SAR1/YPL218W
31391	Elg1 RFC-like complex	5 out of 610 genes, 0.8%	5 out of 7165 background genes, 0.1%	0.00162	0.00	0.00	RFC5/YBR087W:RFC2/YJR068W:RFC3/YNL290W:RFC4/YOL094C:ELG1/YOR144C
5663	DNA replication factor C complex	5 out of 610 genes, 0.8%	5 out of 7165 background genes, 0.1%	0.00162	0.00	0.00	RFC5/YBR087W:RFC2/YJR068W:RFC3/YNL290W:RFC4/YOL094C:RFC1/YOR217W
5851	eukaryotic translation initiation factor 2B complex	5 out of 610 genes, 0.8%	5 out of 7165 background genes, 0.1%	0.00162	0.00	0.00	GCD6/YDR211W:GCD2/YGR083C:GCN3/YKR026C:GCD7/YLR291C:GCD1/YOR260W
5730	nucleolus	52 out of 610 genes, 8.5%	329 out of 7165 background genes, 4.6%	0.00257	0.00	0.00	MAK16/YAL025C:UTP20/YBL004W:MAK5/YBR142W:BUD23/YCR047C:PWP2/YCR057C:NOP14/YDL148C:FAL1/YDR021W:RRP8/YDR083W:UTP4/YDR324C:UTP6/YDR449C:TOM1/YDR457W:NUG1/YER006W:GLC7/YER133W:SPB4/YFL002C:CDC14/YFR028C:DBP3/YGL078C:UTP22/YGR090W:NOP7/YGR103W:YGR283C:RRP3/YHR065C:RPF1/YHR088W:DBP8/YHR169W:CKA1/YIL035C:AIR1/YIL079C:UTP10/YJL109C:DHR2/YKL078W:DRS1/YLL008W:FCF2/YLR051C:DIP2/YLR129W:ACS2/YLR153C:SGD1/YL…
30863	cortical cytoskeleton	17 out of 610 genes, 2.8%	61 out of 7165 background genes, 0.9%	0.00291	0.00	0.00	SLA1/YBL007C:RGD1/YBR260C:LSB5/YCL034W:CYK3/YDL117W:SAC6/YDR129C:RVS167/YDR388W:YPP1/YGR198W:YAP1802/YGR241C:YAP1801/YHR161C:BBC1/YJL020C:ARP3/YJR065C:CAP1/YKL007W:MYO5/YMR109W:SRV2/YNL138W:SLA2/YNL243W:INP53/YOR109W:SCP1/YOR367W
30864	cortical actin cytoskeleton	17 out of 610 genes, 2.8%	61 out of 7165 background genes, 0.9%	0.00291	0.00	0.00	SLA1/YBL007C:RGD1/YBR260C:LSB5/YCL034W:CYK3/YDL117W:SAC6/YDR129C:RVS167/YDR388W:YPP1/YGR198W:YAP1802/YGR241C:YAP1801/YHR161C:BBC1/YJL020C:ARP3/YJR065C:CAP1/YKL007W:MYO5/YMR109W:SRV2/YNL138W:SLA2/YNL243W:INP53/YOR109W:SCP1/YOR367W
30126	COPI vesicle coat	6 out of 610 genes, 1.0%	8 out of 7165 background genes, 0.1%	0.00329	0.00	0.00	COP1/YDL145C:SEC26/YDR238C:RET2/YFR051C:SEC27/YGL137W:SEC21/YNL287W:RET3/YPL010W
30663	COPI-coated vesicle membrane	6 out of 610 genes, 1.0%	8 out of 7165 background genes, 0.1%	0.00329	0.00	0.00	COP1/YDL145C:SEC26/YDR238C:RET2/YFR051C:SEC27/YGL137W:SEC21/YNL287W:RET3/YPL010W
30660	Golgi-associated vesicle membrane	8 out of 610 genes, 1.3%	15 out of 7165 background genes, 0.2%	0.00363	0.00	0.00	COP1/YDL145C:SEC26/YDR238C:RET2/YFR051C:SEC27/YGL137W:LAA1/YJL207C:APL2/YKL135C:SEC21/YNL287W:RET3/YPL010W
30662	coated vesicle membrane	12 out of 610 genes, 2.0%	35 out of 7165 background genes, 0.5%	0.00639	0.00	0.00	APL3/YBL037W:COP1/YDL145C:ENT5/YDR153C:SEC26/YDR238C:RET2/YFR051C:SEC27/YGL137W:LAA1/YJL207C:APL2/YKL135C:SFB2/YNL049C:SEC21/YNL287W:RET3/YPL010W:SAR1/YPL218W
15934	large ribosomal subunit	29 out of 610 genes, 4.8%	150 out of 7165 background genes, 2.1%	0.00724	0.00	0.00	RPL19B/YBL027W:RPL23A/YBL087C:RPL32/YBL092W:RPL19A/YBR084C-A:RPL21A/YBR191W:RPL31A/YDL075W:RPL35B/YDL136W:RPL35A/YDL191W:RPL23B/YER117W:RPL24A/YGL031C:RPL28/YGL103W:RPL9A/YGL147C:RPL26B/YGR034W:NMD3/YHR170W:RPL17B/YJL177W:RPL39/YJL189W:RPL43B/YJR094W-A:RPL17A/YKL180W:RPL15A/YLR029C:RPL10/YLR075W:RPL26A/YLR344W:REH1/YLR387C:RPL31B/YLR406C:RPL9B/YNL067W:RPL3/YOR063W:RPL21B/YPL079W:RPL5/YPL131W:RPL3…
5934	cellular bud tip	21 out of 610 genes, 3.4%	92 out of 7165 background genes, 1.3%	0.00786	0.00	0.00	MYO4/YAL029C:EXO84/YBR102C:ENT1/YDL161W:SAC6/YDR129C:SEC5/YDR166C:SEC3/YER008C:RSP5/YER125W:BEM2/YER155C:MOB2/YFL034C-B:RGD2/YFL047W:SEC15/YGL233W:SEC6/YIL068C:EXO70/YJL085W:CAP1/YKL007W:ROM2/YLR371W:DMA2/YNL116W:MSB3/YNL293W:SSK2/YNR031C:MYO2/YOR326W:HRR25/YPL204W:SEC8/YPR055W
30904	retromer complex	5 out of 610 genes, 0.8%	6 out of 7165 background genes, 0.1%	0.00902	0.00	0.02	VPS29/YHR012W:VPS35/YJL154C:YPT7/YML001W:VPS5/YOR069W:VPS17/YOR132W
33263	CORVET complex	5 out of 610 genes, 0.8%	6 out of 7165 background genes, 0.1%	0.00902	0.00	0.02	VPS8/YAL002W:PEP3/YLR148W:VPS33/YLR396C:PEP5/YMR231W:VPS16/YPL045W
5769	early endosome	6 out of 610 genes, 1.0%	9 out of 7165 background genes, 0.1%	0.00917	0.00	0.02	SWH1/YAR042W:ENT1/YDL161W:TRS120/YDR407C:SNX4/YJL036W:TRS130/YMR218C:MON2/YNL297C

## Sheet: slim mapper results_compartment
GOID	GO term	Frequency	Genome Frequency	Gene(s)
5737	cytoplasm	480 out of 610 genes, 78.7%	4309 of 6433 genes, 67%	VPS8,CYS3,FUN30,CCR4,MYO4,FUN12,RBG1,CDC19,GDH3,SWH1,UTP20,SLA1,FUS3,RPL19B,APL3,URA7,SKT5,RPS8A,ILS1,RPL23A,TEL1,RPL32,SEA4,PKC1,NTH2,IPP1,OLA1,YPK3,ZTA1,RPS11B,SEC18,RPL19A,EXO84,GRS1,PTC4,TPS1,OPY1,HSL7,MEC1,IRA1,SUP45,APD1,CNS1,CDC28,EHT1,RPS6B,RPS9B,RPL21A,SDS24,PYC2,ARO4,RGD1,APM3,HIS4,LSB5,KAR4,SAT4,RHB1,BUD23,PWP2,MSH3,CDC39,ARP2,NAT1,PSA1,RPL31A,VAM6,RPS16B,SUB2,CYK3,RPL35B,ARF2,CCT4,COP…
5634	nucleus	218 out of 610 genes, 35.7%	2208 of 6433 genes, 34.3%	CYS3,FUN30,CCR4,MAK16,GDH3,SWH1,UTP20,SLA1,FUS3,TEL1,PKC1,IPP1,ZTA1,MEC1,MAK5,APD1,CDC28,ARO4,CHK1,KAR4,TAF2,BUD23,PWP2,MSH3,CDC39,RPT2,CDC7,SUB2,POL3,CYK3,RPN5,NOP14,LYS20,GLE1,FAL1,RRP8,RLI1,HOM2,TRM82,CAB5,ADR1,HRQ1,CFT1,UTP4,BCP1,UBA2,RPN9,UTP6,TOM1,LCD1,YRF1-1,EDC3,NUG1,PRE1,ARB1,HMF1,RNR1,PUP3,RPL23B,RSP5,NSA2,GLC7,GCG1,CCA1,SPB4,SMC1,MOB2,RPN11,CDC14,SMC2,IRC5,SCL1,TRP5,RPT6,SDS23,DBP3,SEH…
16020	membrane	142 out of 610 genes, 23.3%	1629 of 6433 genes, 25.3%	VPS8,CDC19,APL3,SEA4,PKC1,EXO84,IRA1,EHT1,RGD1,APM3,RHB1,VAM6,COP1,GGC1,GLE1,SSB1,VPS41,MTC5,SAC6,ENT5,HOM2,SEC5,SEC26,TOM1,SPF1,SEC3,PRE1,PUP3,RSP5,BEM2,FET5,FAB1,RET2,ERG26,SCL1,SEH1,SEC27,SEC15,MSP1,YGR125W,TDH3,YPP1,PFK1,YAP1802,APL6,YTA7,LEU5,VPS29,OSH3,YAP1801,ERG9,SCH9,FIS1,SEC6,SLM1,PRE3,SNX4,IML2,EXO70,UTP10,URA2,LCB3,VPS35,LAA1,RAV1,ARP3,OPI3,IML1,CAP1,MAK11,YJU3,YPK1,APL2,MCR1,PEX1,TOR…
5739	mitochondrion	97 out of 610 genes, 15.9%	1178 of 6433 genes, 18.3%	FUN30,MYO4,FUN12,GDH3,FUS3,TEL1,NTH2,GRS1,OPY1,MEC1,IRA1,EHT1,SAT4,ARP2,NAT1,NOP14,GLT1,LYS20,GGC1,GLE1,VPS54,TPS2,DOP1,CAB5,CFT1,RPS18A,SPF1,HMF1,RPS24A,RSP5,BEM2,CCA1,FAU1,RPN11,FAB1,SMC2,SCL1,GCN1,NCS6,GUS1,MSP1,CYS4,TDH3,PFK1,LEU5,ERG9,FIS1,SLM1,TAO3,IML2,UTP10,URA2,OPI3,TMA19,TEF4,YJU3,MCR1,GPM1,FAS1,TOR2,DNM1,LMO1,VPS13,XDJ1,MDN1,GCD7,STT4,ARC18,DCK1,YPT7,RPS18B,EIS1,IMP2,YIM1,HSC82,PFK2,EF…
5840	ribosome	93 out of 610 genes, 15.2%	357 of 6433 genes, 5.5%	FUN12,RBG1,RPL19B,RPS8A,RPL23A,RPL32,RPS11B,RPL19A,CDC28,RPS6B,RPS9B,RPL21A,NAT1,RPL31A,RPS16B,RPL35B,RPL35A,RPS11A,RPS13,RLI1,RPS17B,RPS18A,TMA20,ARB1,RPS24A,RPS8B,RPL23B,RPS26B,GCN20,RPL24A,RPL28,RPS2,RPL9A,RPS26A,GCN1,RPS25A,RPL26B,RPS23A,YPP1,RPS0A,YGR283C,RPS20,ARD1,YHR020W,NMD3,RPS4B,RPS24B,TMA108,RPL17B,RPL39,RPS22A,RPS14B,LAA1,SUI2,RPL43B,RPS4A,TMA19,TEF4,RPL17A,RPL15A,RPS0B,RPL10,YEF3,RP…
12505	endomembrane system	87 out of 610 genes, 14.3%	977 of 6433 genes, 15.2%	VPS8,SWH1,APL3,SEC18,CDC28,ARF2,COP1,ENT1,ARF1,GLE1,VPS54,VPS41,TRS85,DOP1,ENT5,CAB5,SEC26,TRS23,DPL1,TRS120,TRS31,VPS52,SPF1,PRE1,PUP3,RSP5,FET5,FAB1,RET2,ERG26,SCL1,SEH1,SEC27,YPP1,YTA7,VPS29,RPN1,OSH3,ERG9,PRE3,VPS53,SNX4,LCB3,VPS35,LAA1,OPI3,PRI2,YJU3,APL2,VPS13,ERG3,PEP3,YPT6,VPS33,YPT7,PRE8,GTR1,MVP1,SEC14,YIM1,TRS130,PEP5,HAS1,UBP15,PRE5,LST8,SFB2,SEC21,MSB3,MON2,PRE6,INP54,IRA2,VPS5,VPS17…
30427	site of polarized growth	54 out of 610 genes, 8.9%	262 of 6433 genes, 4.1%	MYO4,SLA1,FUS3,APL3,SKT5,PKC1,SEC18,EXO84,HSL7,CDC28,RGD1,CYK3,STE7,ENT1,SAC6,SEC5,RVS167,GIN4,SEC3,RSP5,GLC7,BEM2,MOB2,RGD2,SEC15,DBF2,YAP1802,KIC1,YAP1801,SEC6,MOB1,TAO3,EXO70,CAP1,YPK1,HYM1,SEC10,ENT2,ROM2,MYO5,DMA2,SRV2,SLA2,MSB3,SSK2,CMR2,MYO2,RGL1,HOS3,HRR25,SRO7,SEC8,DBF20,AXL1
5730	nucleolus	52 out of 610 genes, 8.5%	329 of 6433 genes, 5.1%	MAK16,UTP20,MAK5,BUD23,PWP2,NOP14,FAL1,RRP8,UTP4,UTP6,TOM1,NUG1,GLC7,SPB4,CDC14,DBP3,UTP22,NOP7,YGR283C,RRP3,RPF1,DBP8,CKA1,AIR1,UTP10,DHR2,DRS1,FCF2,DIP2,ACS2,SGD1,UTP21,ERB1,UTP15,RRB1,HAS1,RCM1,IMP4,KRE33,UBP10,NOG2,RCL1,RIO1,PNO1,YTM1,RRS1,NOG1,NAN1,TGS1,NIP7,BMS1,NOC4
5933	cellular bud	48 out of 610 genes, 7.9%	241 of 6433 genes, 3.7%	LTE1,MYO4,SLA1,APL3,SKT5,PKC1,EXO84,HSL7,CDC28,RGD1,CYK3,ENT1,SAC6,SEC5,GIN4,SEC3,RSP5,GLC7,BEM2,MOB2,RGD2,SEC15,DBF2,YAP1802,KIC1,YAP1801,SEC6,MOB1,TAO3,EXO70,CAP1,YPK1,HYM1,SEC10,ROM2,MYO5,DMA2,SLA2,MSB3,SSK2,CMR2,MYO2,RGL1,HOS3,HRR25,SEC8,DBF20,AXL1
31410	cytoplasmic vesicle	47 out of 610 genes, 7.7%	237 of 6433 genes, 3.7%	VPS8,SWH1,APL3,COP1,ENT1,VPS54,VPS41,TRS85,DOP1,ENT5,SEC26,TRS23,TRS120,TRS31,VPS52,RSP5,FAB1,RET2,SEC27,YPP1,CPD1,VPS29,VPS53,SNX4,VPS35,LAA1,APL2,VPS13,PEP3,VPS33,GTR1,MVP1,TRS130,PEP5,LST8,SFB2,SEC21,MSB3,MON2,VPS5,VPS17,MYO2,SNX3,RET3,VPS16,ATG21,SAR1
5856	cytoskeleton	42 out of 610 genes, 6.9%	200 of 6433 genes, 3.1%	MYO4,SLA1,SKT5,PKC1,HSL7,CDC28,RGD1,LSB5,ARP2,CYK3,SAC6,RVS167,PAC11,GLC7,CDC14,DBF2,YPP1,YAP1802,YAP1801,MOB1,BBC1,ARP3,CAP1,ARC19,DYN1,TUB4,ARC18,TEM1,TUB1,TUB3,MYO5,DMA2,SRV2,SLA2,ARC35,INP53,MYO2,SCP1,HRR25,IPL1,DBF20,KAR3
5886	plasma membrane	38 out of 610 genes, 6.2%	395 of 6433 genes, 6.1%	CDC19,APL3,PKC1,RHB1,SSB1,SAC6,HOM2,RSP5,BEM2,TDH3,YPP1,OSH3,SLM1,EXO70,ARP3,CAP1,YJU3,YPK1,TOR2,LMO1,MET17,STT4,DCK1,SST2,PPZ1,EIS1,HSC82,EFR3,FAA4,LST8,SLM2,SSB2,MSB3,AIF1,FAA1,LSP1,HRR25,SRO7
5938	cell cortex	35 out of 610 genes, 5.7%	147 of 6433 genes, 2.3%	SLA1,SKT5,EXO84,HSL7,RGD1,LSB5,CYK3,SAC6,SEC5,DPL1,RVS167,PKH1,SEC3,BEM2,SEC15,YPP1,YAP1802,OSH3,YAP1801,SEC6,BBC1,EXO70,ARP3,CAP1,DYN1,SEC10,MYO5,DMA2,SRV2,SLA2,MSB3,SSK2,INP53,SCP1,SEC8
5694	chromosome	34 out of 610 genes, 5.6%	386 of 6433 genes, 6.0%	FUN30,RFC5,CDC7,SUB2,POL3,LCD1,GLC7,SMC1,SMC2,SNT2,GCN5,RRM3,TRA1,CTF8,SCH9,PRI1,UTP10,RFC2,TTI2,PRI2,PDS5,UTP15,SAP30,RFC3,RPD3,RFC4,CTR9,RIO1,ELG1,RFC1,ESA1,NAN1,HRR25,IPL1
5773	vacuole	31 out of 610 genes, 5.1%	470 of 6433 genes, 7.3%	URA7,SEA4,VAM6,VPS41,MTC5,FET5,FAB1,SEH1,YGR125W,PFK1,SCH9,VPS35,IML1,TOR2,PEP3,VAC14,VPS33,YPT7,GTR1,VBA1,PFK2,PEP5,YNL115C,MSB3,FIG4,INP54,MYO2,SNX3,VPS16,ATG21,VPS30
5783	endoplasmic reticulum	27 out of 610 genes, 4.4%	615 of 6433 genes, 9.6%	SWH1,CDC28,CAB5,DPL1,SPF1,PRE1,PUP3,FET5,ERG26,YTA7,RPN1,OSH3,ERG9,PRE3,LCB3,OPI3,YJU3,ERG3,YIM1,UBP15,INP54,IRA2,PUP1,FAA1,SAR1,SRP54,PRE2
5794	Golgi apparatus	27 out of 610 genes, 4.4%	199 of 6433 genes, 3.1%	SWH1,SEC18,ARF2,COP1,ARF1,VPS54,TRS85,DOP1,SEC26,TRS23,TRS120,TRS31,VPS52,RSP5,RET2,SEC27,VPS53,LAA1,APL2,YPT6,SEC14,TRS130,LST8,SEC21,MON2,RET3,HRR25
5575	cellular component unknown	22 out of 610 genes, 3.6%	677 of 6433 genes, 10.5%	FLP1,KIN3,ALK2,PPZ2,PKH3,YEL077C,ALK1,YGL117W,YIL177C,YKL033W-A,MTC2,GFA1,AIM32,MGL2,GUA1,ADH6,MCK1,CIN1,YRF1-8,MET12,YPL034W,YPR084W
5740	mitochondrial envelope	21 out of 610 genes, 3.4%	355 of 6433 genes, 5.5%	EHT1,GGC1,HMF1,MSP1,LEU5,ERG9,FIS1,IML2,YJU3,MCR1,GPM1,DNM1,XDJ1,YPT7,IMP2,SAL1,TIM23,ORT1,ODC2,FAA1,LSP1
5815	microtubule organizing center	14 out of 610 genes, 2.3%	73 of 6433 genes, 1.1%	HSL7,CDC28,GLC7,CDC14,DBF2,MOB1,DYN1,TUB4,TEM1,TUB1,TUB3,HRR25,DBF20,KAR3
5777	peroxisome	6 out of 610 genes, 1%	76 of 6433 genes, 1.2%	PEX7,MSP1,FIS1,PEX1,DNM1,UBP15
5618	cell wall	1 out of 610 genes, 0.2%	98 of 6433 genes, 1.5%	TDH3
5576	extracellular region	0 out of 610 genes, 0%	31 of 6433 genes, 0.5%	none
other	other	11 out of 610 genes, 1.8%		CDC53,RPT3,RPN3,PCL6,UBP6,FUR1,RPT1,PNP1,CGI121,RPT5,DIM1
